# Supplementary material for: Identification of key regions and residues controlling Aβ folding and assembly
Source: PubMed Central journal article supplement (PMC5626695; doi:10.1038/s41598-017-10845-6), 2017-10-03

## SUPPLEMENTAL INFORMATON

### Identification of key regions and residues controlling A $\beta$ folding and assembly

Eric Y. Hayden<sup>a</sup>, Kimberly K. Hoi<sup>a#</sup>, Jasmine Lopez<sup>a</sup>, Mohammed Inayathullah<sup>c</sup>,  
Margaret M. Condron<sup>a</sup>, and David B. Teplow<sup>ab\*</sup>

<sup>a</sup>Department of Neurology, David Geffen School of Medicine at UCLA, Los Angeles,  
CA 90095

<sup>b</sup>Molecular Biology Institute and Brain Research Institute; UCLA, Los Angeles, CA  
90095

<sup>c</sup>Biomaterials and Advanced Drug Delivery Laboratory, School of Medicine, Stanford  
University, Palo Alto, CA 94304, USA

<sup>#</sup>Current address: Department of Pediatrics and Department of Neurology, UCSF, San  
Francisco, CA 94158

## Figure Legends

**Figure S1: Fibril formation kinetics of di-D-amino acid substituted A $\beta$ .** Peptides (40  $\mu$ M A $\beta$ 40, 20  $\mu$ M A $\beta$ 42) were mixed with Thioflavin T in 10 mM sodium phosphate, pH 7.4, and incubated with shaking at 37° C. The peptides examined are shown in the boxes to the right of each sub-figure. Note that semi-log plots are shown.

**Figure S2: Effects of substitutions on lag time in ThT fluorescence studies of fibril formation.** Left panels: lag times (ordinate) for (A) A $\beta$ 40 and (B) A $\beta$ 42 were calculated as discussed in Methods and presented relative to positions of di-D amino acid substitutions (abscissa). Right panels: correlations of lag time and  $t_{1/2}$  for (A) A $\beta$ 40 and (B) A $\beta$ 42. Cross-correlation plots of lag time versus  $t_{1/2}$  show that the two metrics are strongly correlated. Correlation coefficients  $R$  were determined by linear fitting to the scatter plots using Kaleidagraph (version 4.5.2) graphing/data analysis software.

**Figure S3: Correlations of metrics determined from fibril formation kinetics.** Cross-correlation of the  $dFU/dt$ ,  $t_{1/2}$ , and  $FU_{max}$  determined by linear fitting to each of the respective scatter plots of A $\beta$ 40 and A $\beta$ 42 revealed a correlation (A $\beta$ 40:  $R=0.73$  [0.96 with two outliers (red points) removed] and A $\beta$ 42:  $R=0.91$ ) between  $dFU/dt$  and  $FU_{max}$ . No correlations were observed between  $dFU/dt$  and  $t_{1/2}$  or between  $FU_{max}$  and  $t_{1/2}$  for A $\beta$ 40 or A $\beta$ 42.

**Figure S4: Oligomerization of single D-amino acid substituted A $\beta$ 40.** Cross-linked A $\beta$ 40 was analyzed using SDS-PAGE and silver staining. Densitometry was performed on representative gels and oligomer frequency distributions were plotted for WT, D-N27 and D-I32.

**Figure S5: Fibril formation kinetics of single D-amino acid substituted A $\beta$ .** Peptides (40  $\mu$ M A $\beta$ 40, 20  $\mu$ M A $\beta$ 42) were mixed with Thioflavin T in 10 mM sodium phosphate, pH 7.4, and incubated with shaking at 37° C. (A) A $\beta$ 40 with single D-amino acid substitutions. (B) A $\beta$ 42 with single D-amino acid substitutions. The peptides examined are shown in the boxes inside each panel. This is the linear presentation of the data in Fig. 6.

**Figure S6: Morphology of A $\beta$ 42 D-F20.** Negative stain electron microscopy of A $\beta$ 42 D-F20 at t = 0 hrs.

Fig. S1

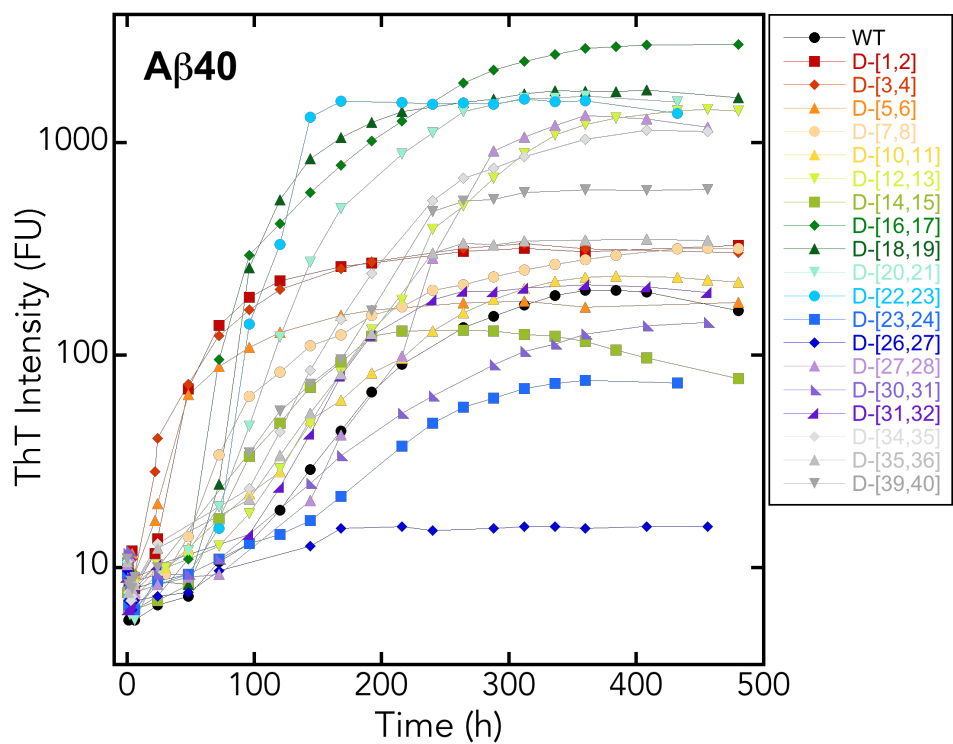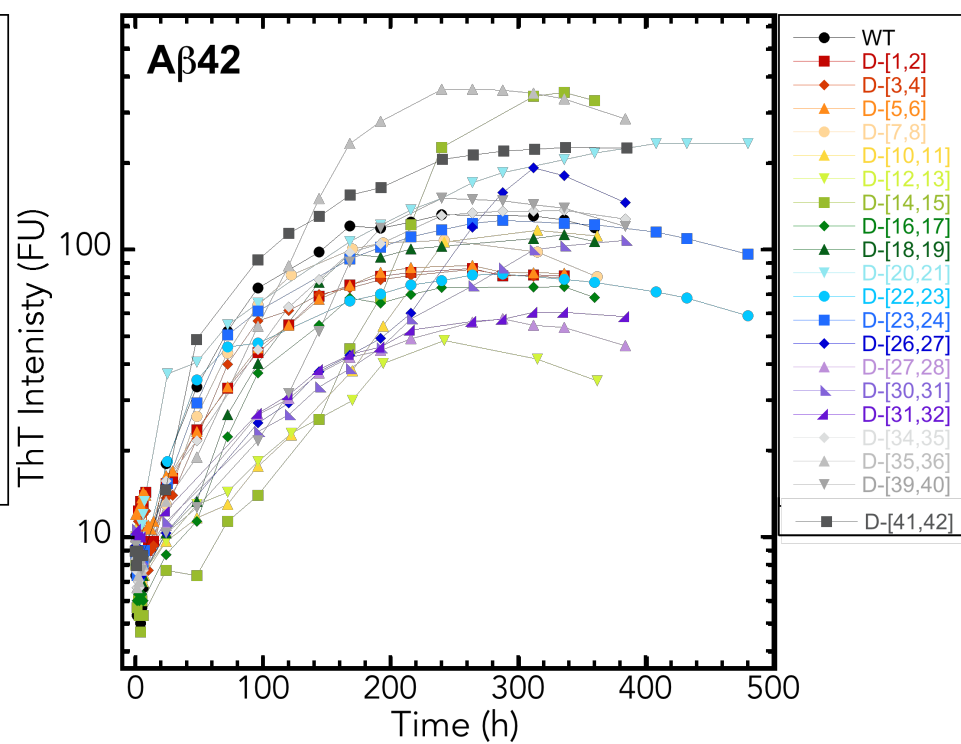

Fig. S2

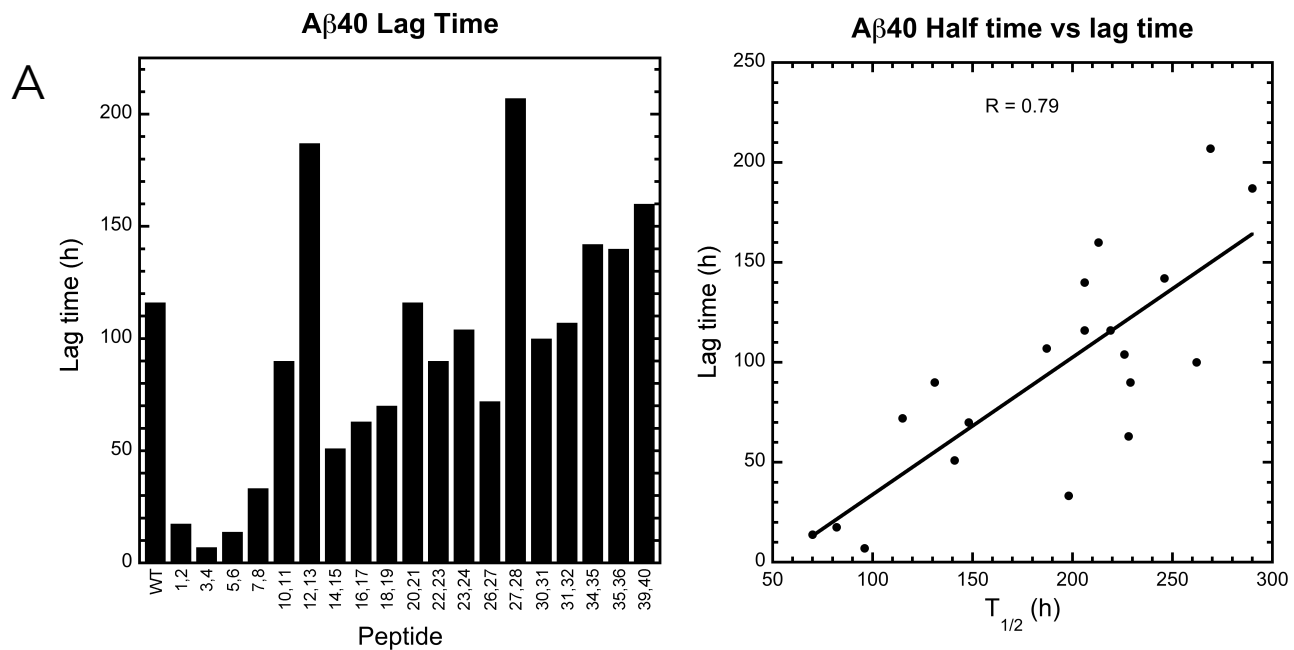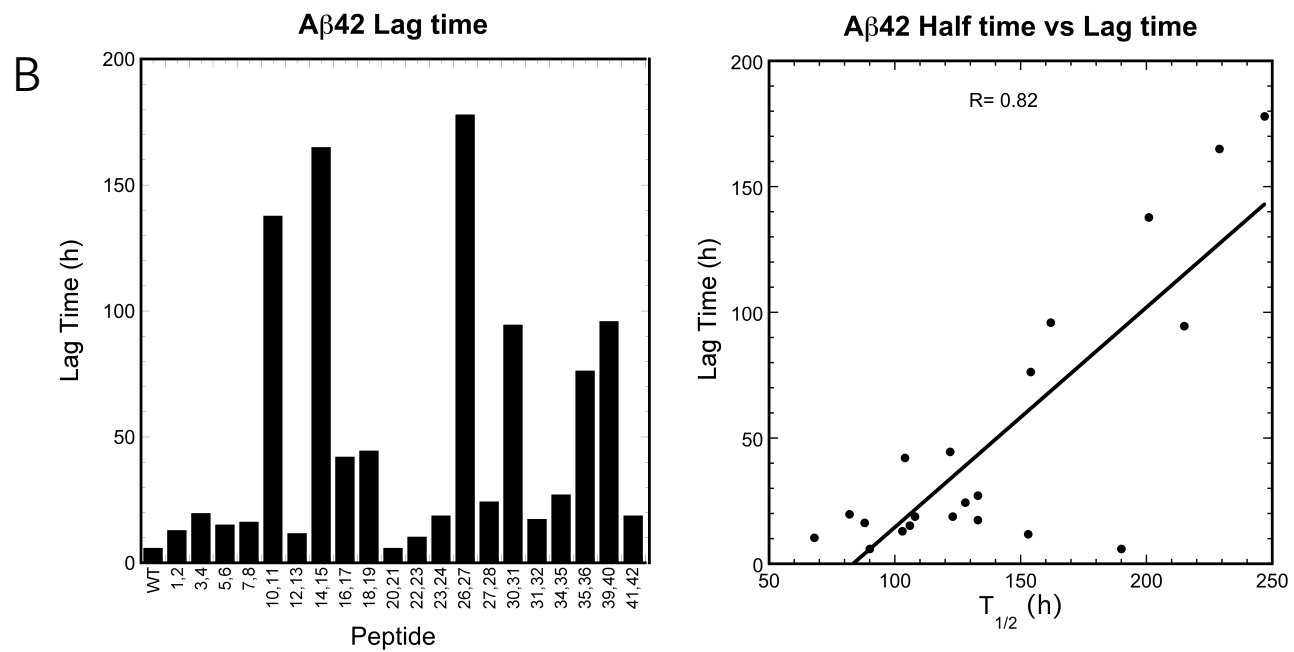

Fig. S3

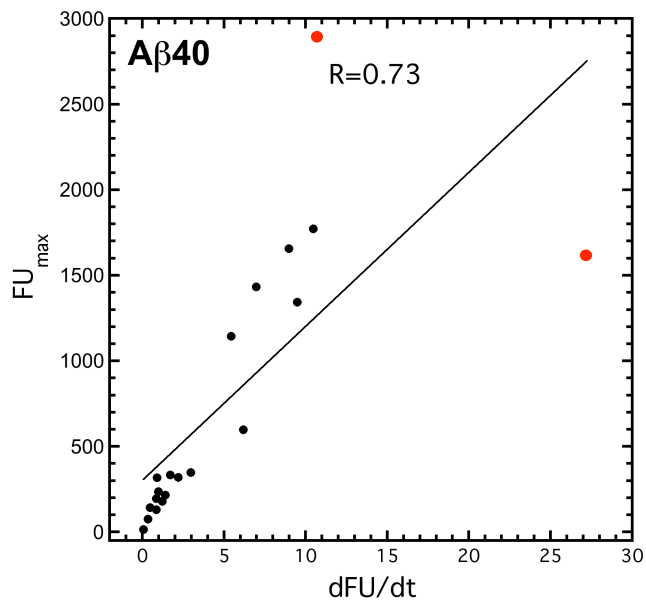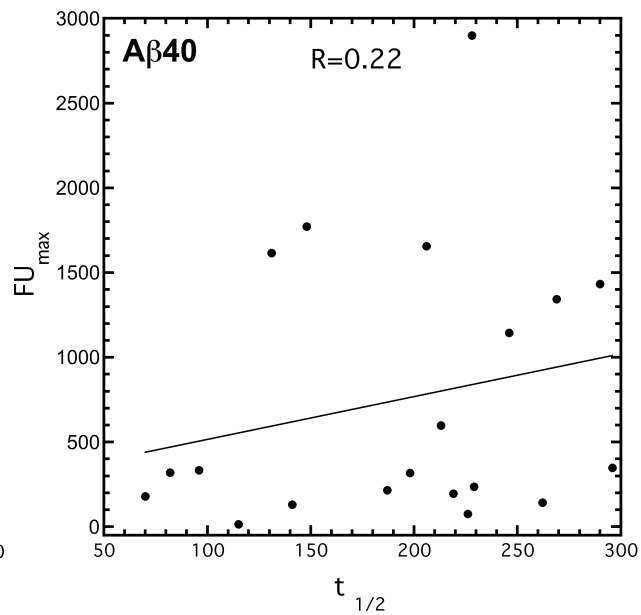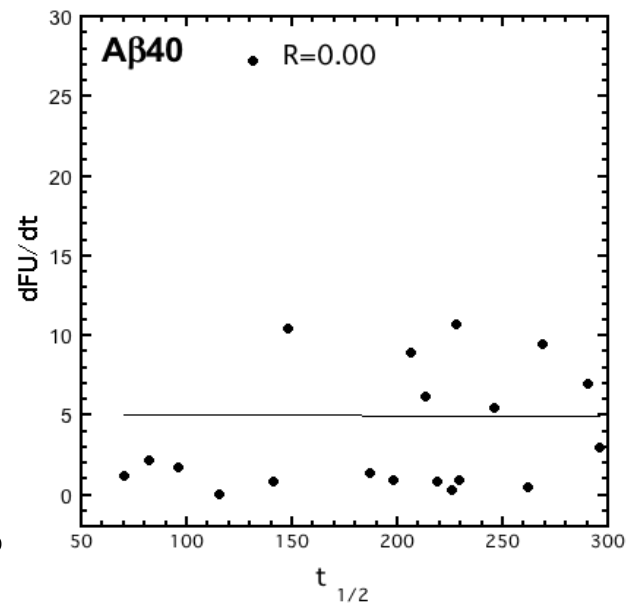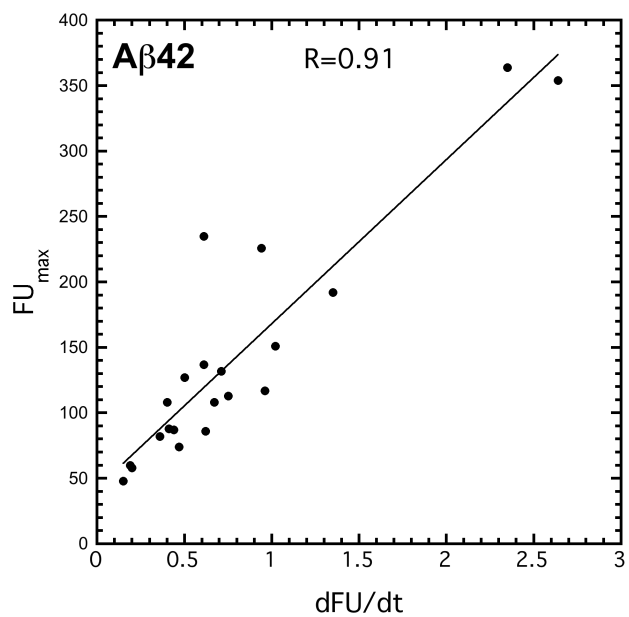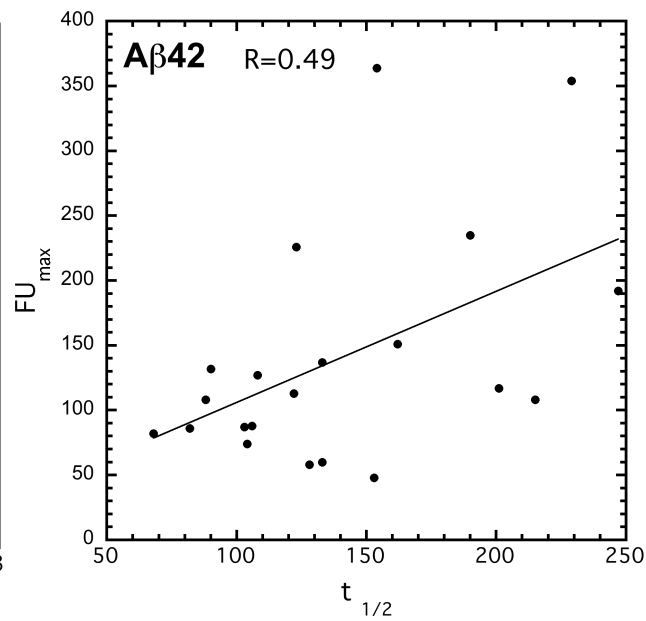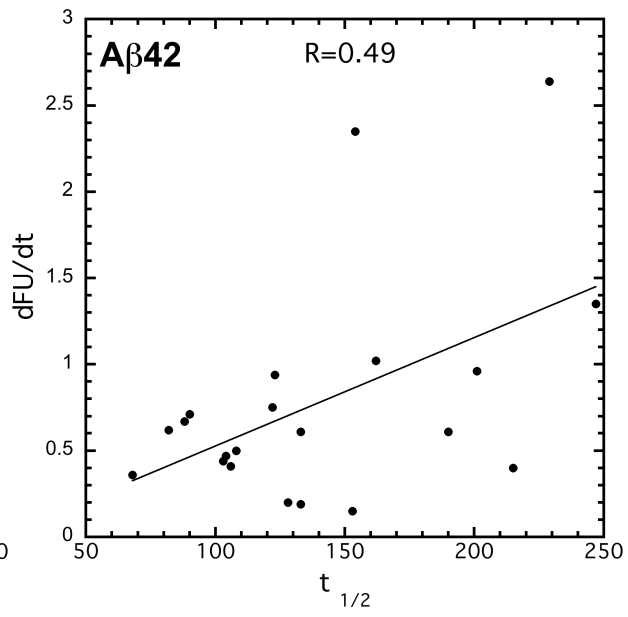

Fig. S4

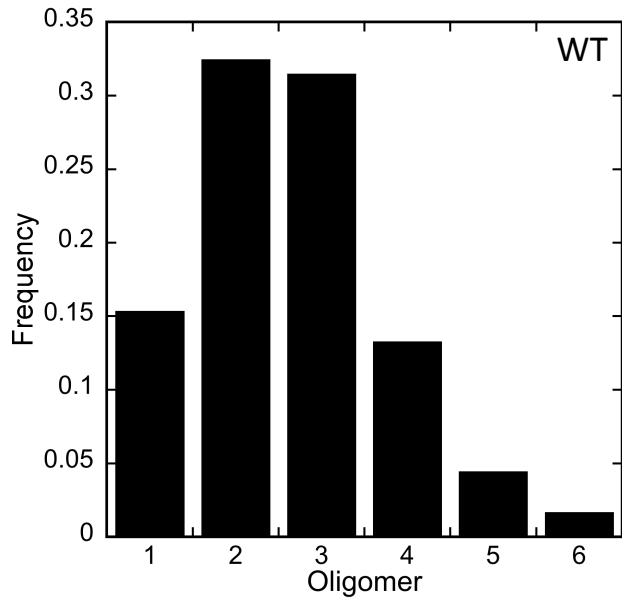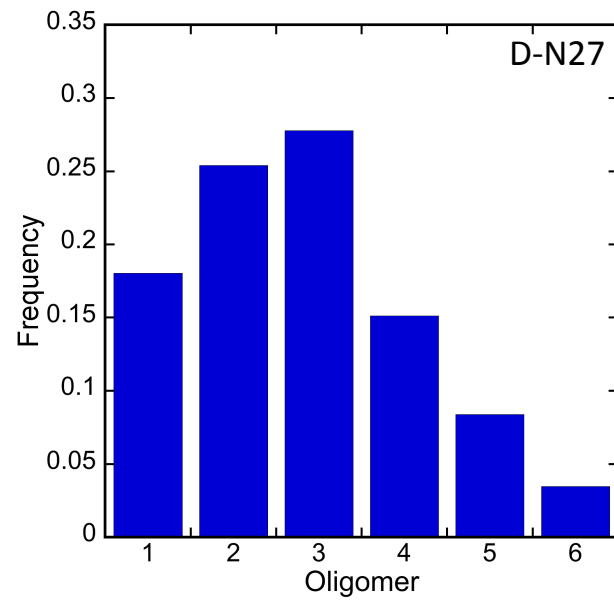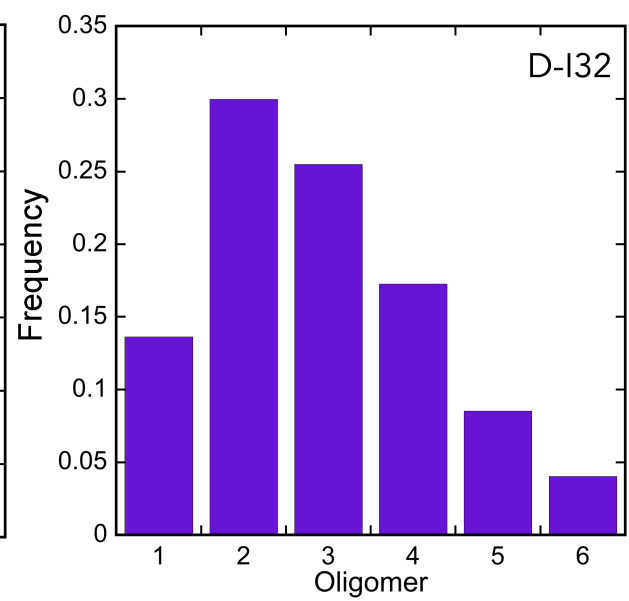

Fig. S5

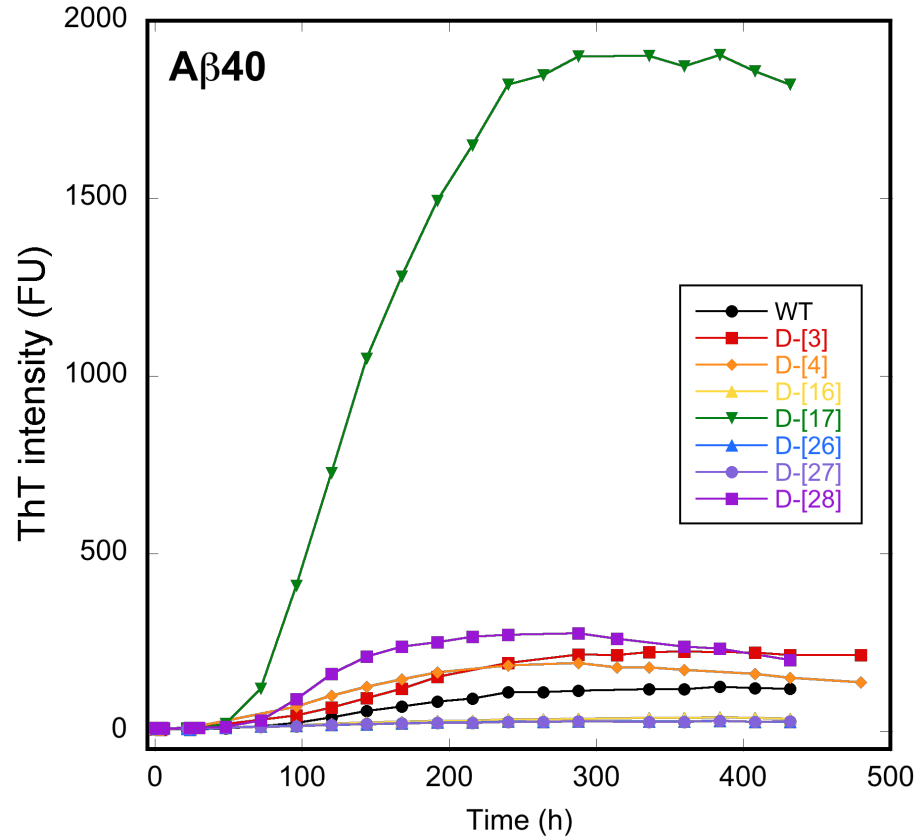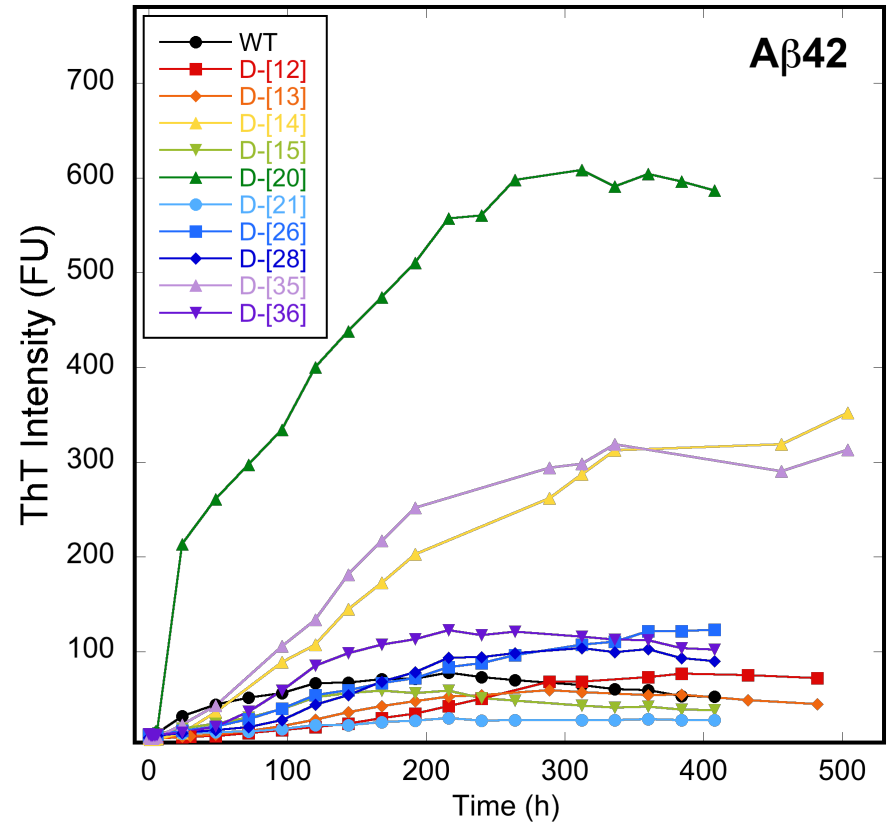



Fig. S6

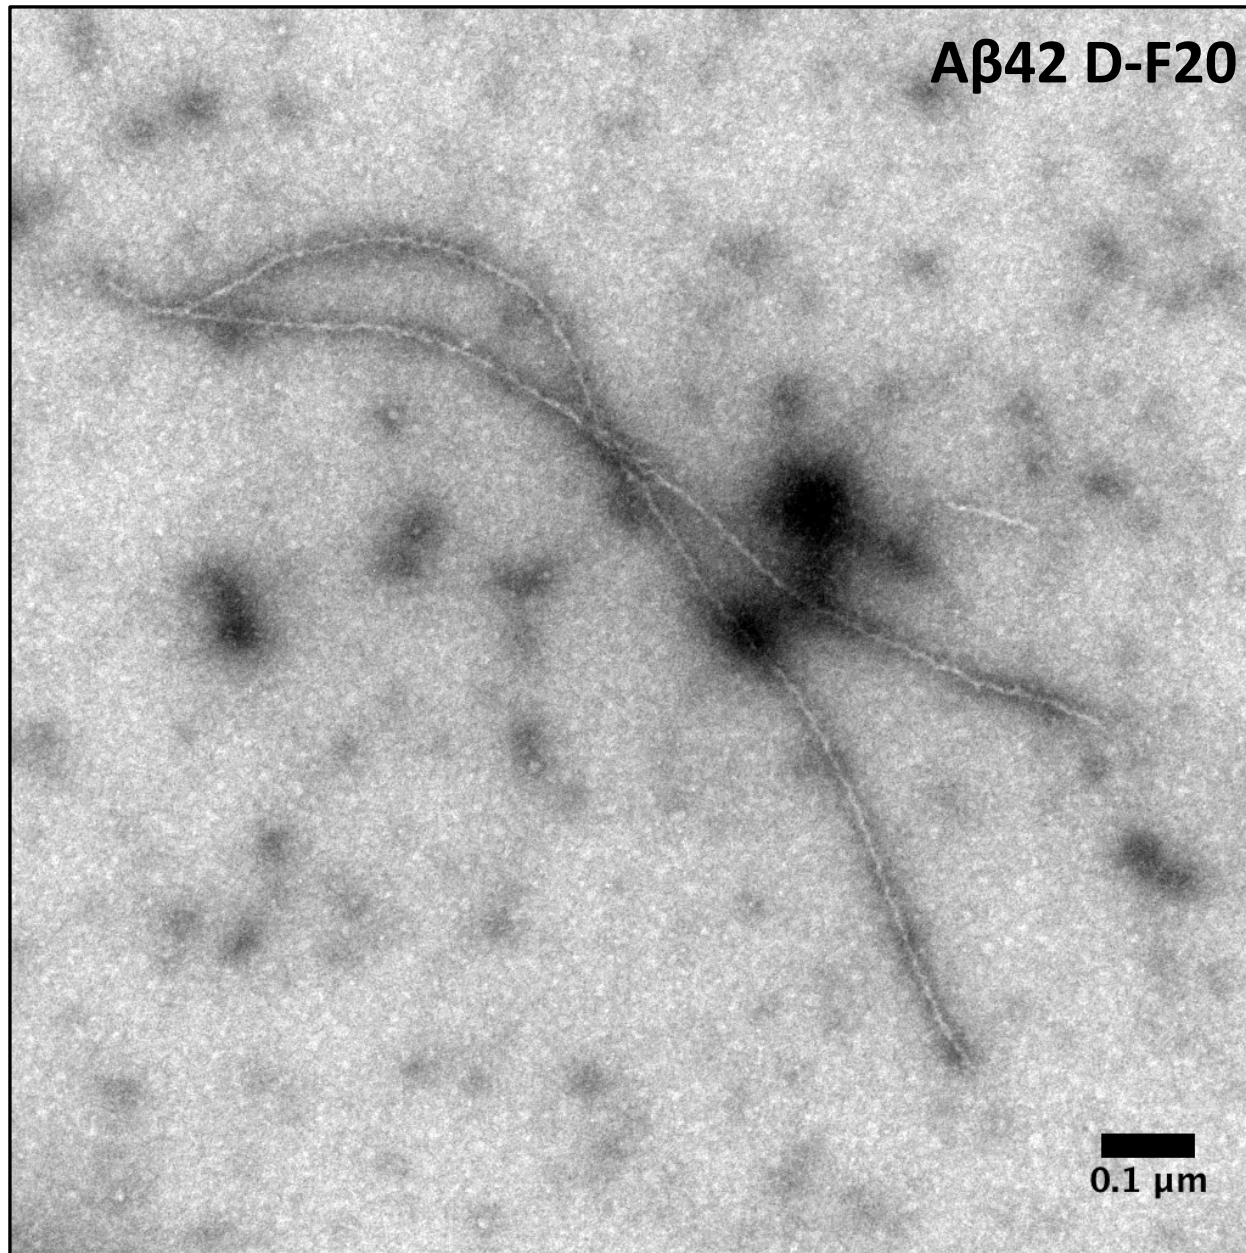

Supplement: 41598_2017_10845_MOESM1_ESM.pdf [file 41598_2017_10845_MOESM1_ESM.pdf]
